# Supplementary material for: Using light, X-rays and electrons for evaluation of the nanostructure of layered materials
Source: Royal Society of Chemistry journal article supplement (doi:10.1039/c8nr07287f), 2018-01-01
Supplement: c8nr07287f1.pdf [file c8nr07287f1.pdf]

# Using Light, X-rays and Electrons for Evaluation of the Nanostructure of Layered Materials

John Djamil,<sup>[a]</sup> Anna-Lena Hansen,<sup>[a]</sup> Claudia Backes<sup>[b]</sup>, Wolfgang Bensch,<sup>\*,[a]</sup> Ulrich Schürmann,<sup>[c]</sup> Lorenz Kienle,<sup>[c]</sup> Andre Düvel,<sup>[d]</sup> Paul Heitjans<sup>[d]</sup>

## SUPPORTING INFORMATION

Further details to the high energy ball-milling process

In previous studies using the same SPEX 8000M mill alumina contamination of oxide samples of up to about 1 weight percent was observed, depending on the milling time.<sup>1–3</sup> Influences of the alumina contamination on various properties were, however, not detectable, neither as (photo)catalytic<sup>2</sup> nor as diffusive properties<sup>2,3</sup> were concerned.

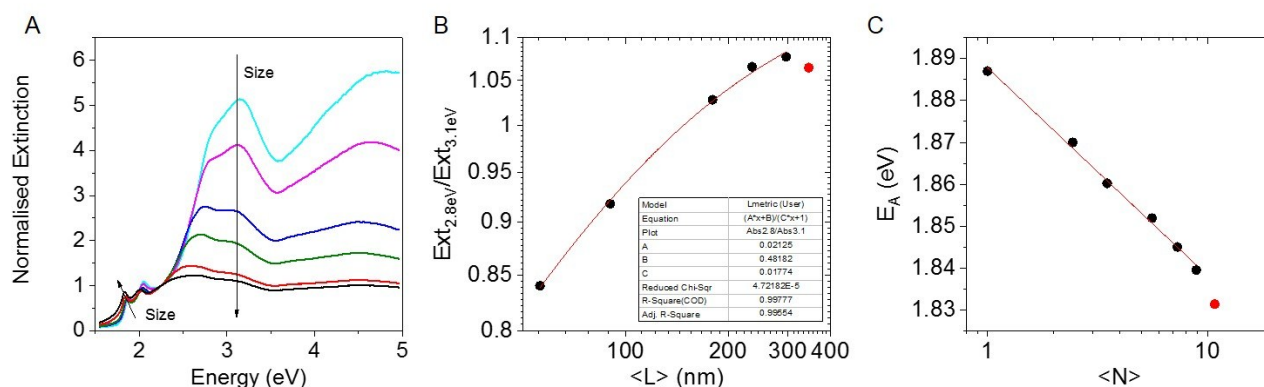

**Figure S1:** UV Vis spectra MoS<sub>2</sub> from liquid exfoliation: Similar changes in spectral shape; knowledge of  $\langle L \rangle$  and  $\langle N \rangle$  (determined by microscopy stats) gives metric equations to relate spectral changes to nanosheet dimensions. Here: Peak intensity ratio adjusted from original publication to a range applicable to ball milled samples

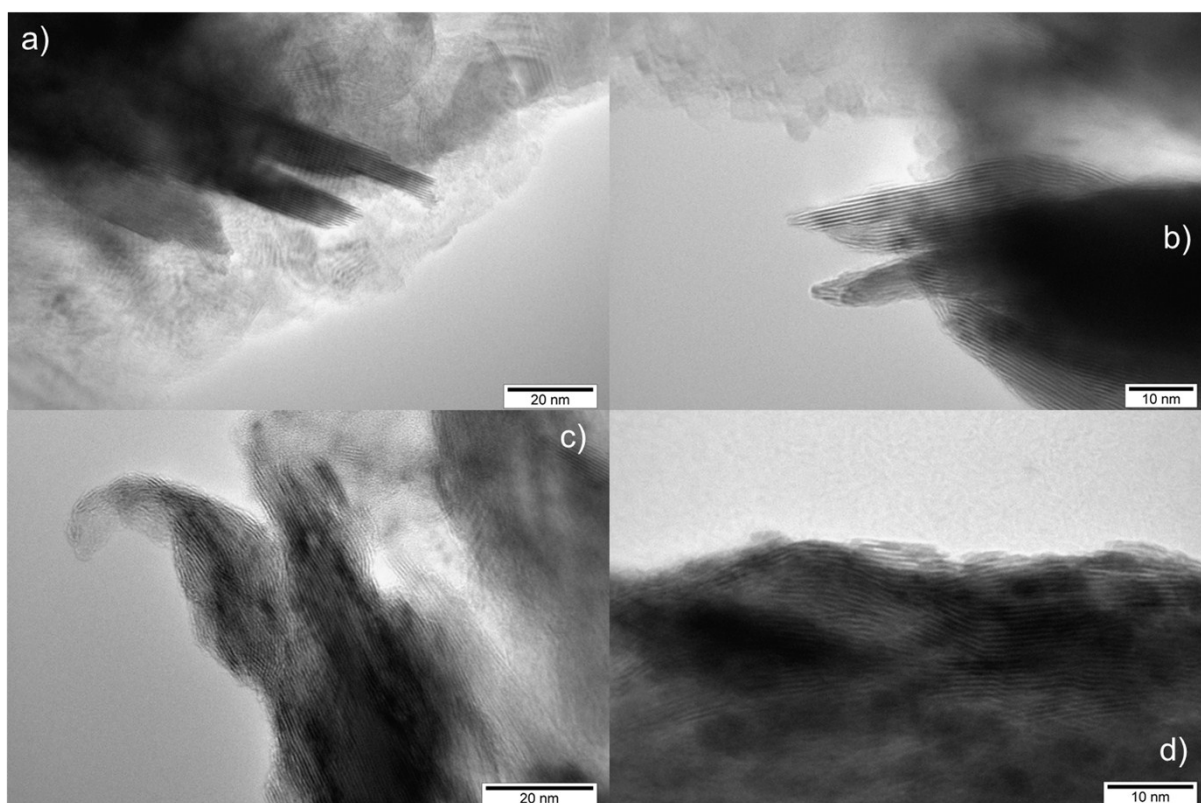

**Figure S2.** TEM micrographs of a) bm<sub>1</sub>, b) bm<sub>2</sub>, c) bm<sub>4</sub> and d) bm<sub>8</sub>.

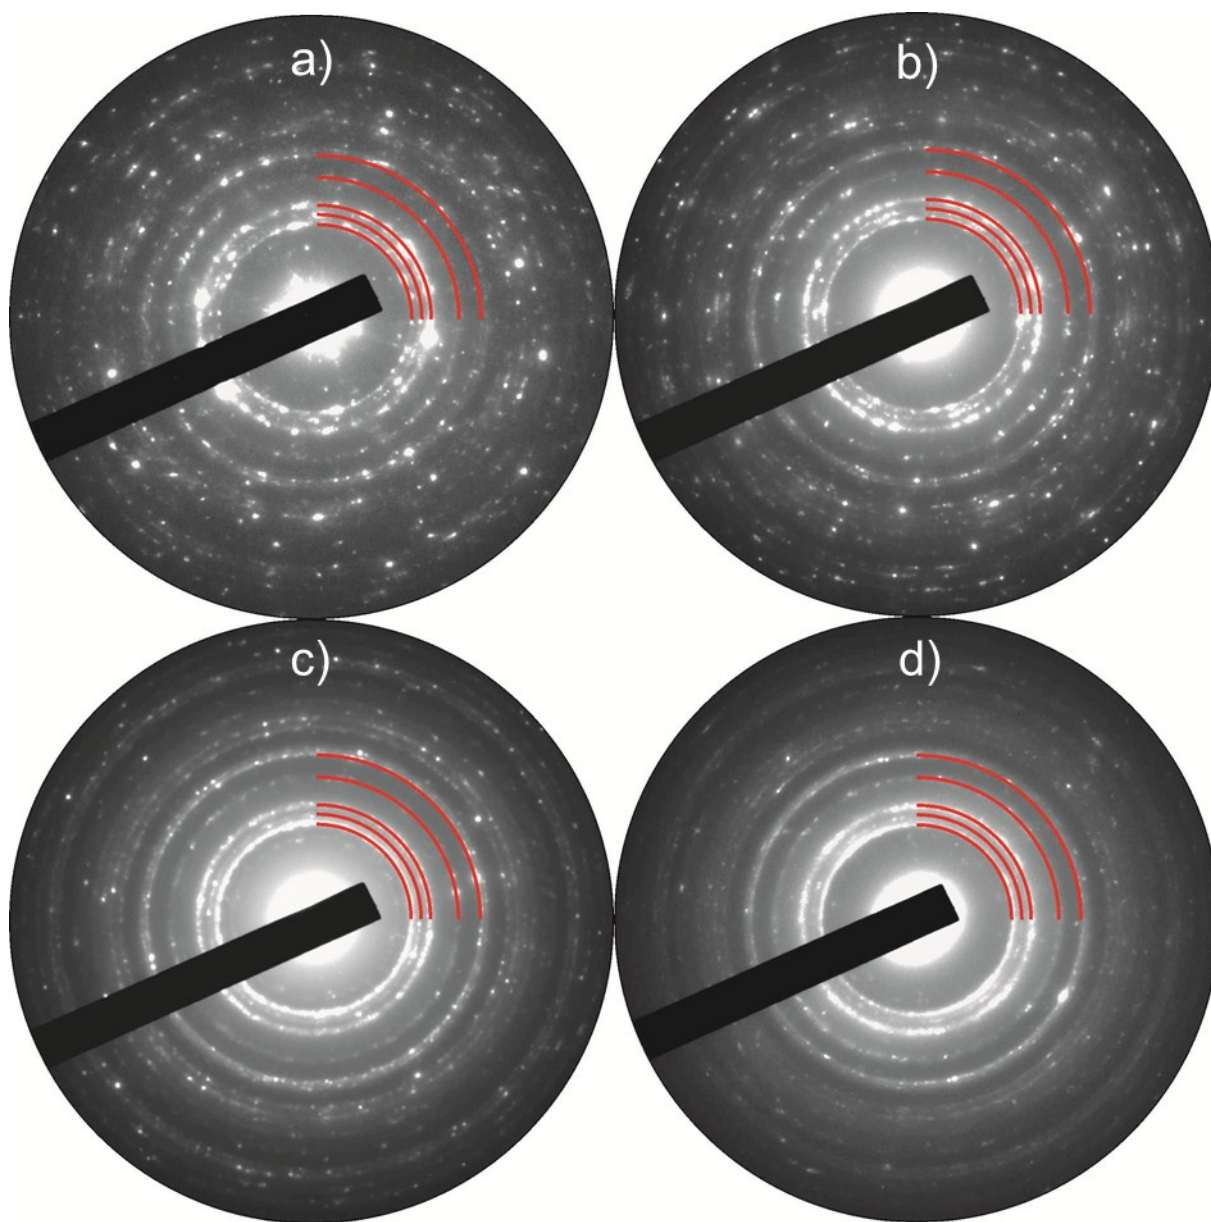

**Figure S3.** SAED patterns of a) bm1, b) bm2, c) bm4 and d) bm8. The red quarter-circles represents the lattice planes (100), (102), (103) and (105) from inside to outside.

### References

- 1 R. Amade, P. Heitjans, S. Indris, M. Finger, A. Haeger, D. Hesse, *J. Photochem. Photobio. A* 2009, **207**, 231-235.
- 2 P. Heitjans, M. Masoud, A. Feldhoff, M. Wilkening, *Faraday Discuss.* 2007, **134**, 67-82.
- 3 P. Heitjans, M. Masoud, A. Feldhoff, M. Wilkening, *Faraday Discuss.* 2007, **134**, 103-118.
